# Supplementary material for: A Proteomic Analysis of the Body Wall, Digestive Tract, and Reproductive Tract of Brugia malayi
Source: PLoS Negl Trop Dis. 2015 Sep 14;9(9):e0004054. doi: 10.1371/journal.pntd.0004054 (PMC4569401; doi:10.1371/journal.pntd.0004054)
Supplement: S5 Table — *specific to the digestive tract (XLSX) [file pntd.0004054.s011.xlsx]

## Sheet: S5_table
			NSAF			NSAF enrichment
Rank	PUB_Locus	Name	Digestive Tract	Body Wall	Reproductive Tract	Digestive Tract	Body Wall	Reproductive Tract
1	Bm1_13285	hypothetical protein	0.0064	0.0017	0.00049	2.98	0.24	0.06
2	Bm1_41515	40S ribosomal protein S21, putative	0.0054	0	0.0025	2.17	0	0.46
3	Bm1_29895	hypothetical protein	0.0042	0.0003	0.00044	5.75	0.06	0.1
4	Bm1_22285	hypothetical protein	0.0036	0.00077	0.001	2.04	0.17	0.23
5	Bm1_30455	hypothetical protein	0.0036	0	5.3e-05	67.74	0	0.01
6	Bm1_28910	Calsequestrin, skeletal muscle isoform precursor, putative	0.0025	0.00061	0.00027	2.9	0.22	0.08
7	Bm1_14235	SNARE domain containing protein	0.0024	0.00065	0.00056	2	0.22	0.18
8	Bm1_45035	Probable myosin regulatory light chain, putative	0.0022	7.9e-05	0.00079	2.5	0.03	0.35
9	Bm1_02860	hypothetical protein	0.0021	0.00042	0	5.12	0.2	0
10	Bm1_26675	Hypothetical protein	0.0017	0.00016	0.00061	2.24	0.07	0.32
11	Bm1_17375	conserved hypothetical protein	0.0016	0.00019	0.00049	2.31	0.09	0.28
12	Bm1_05080	hypothetical protein	0.0014	0.00056	0	2.56	0.39	0
13	Bm1_34740	aspartic protease BmAsp-1, identical	0.0011	6.8e-05	0	16	0.06	0
14	Bm1_15300	Hypothetical protein	0.001	0.00041	0	2.56	0.39	0
15	Bm1_21135	Acyl CoA binding protein	0.0009	0.00012	0	7.68	0.13	0
16	Bm1_02265	MGC69076 protein-related	0.00073	0.0001	9e-05	3.77	0.13	0.11
17	Bm1_13480	UDP-glucoronosyl and UDP-glucosyl transferase family protein	0.0007	2.5e-05	0	28.16	0.04	0
18	Bm1_20295	Glycine-rich RNA-binding protein.-related	0.00069	7.7e-05	0	8.96	0.11	0
19	Bm1_48620	hypothetical protein	0.00066	7.4e-05	0.00019	2.48	0.09	0.26
20	Bm1_32995	hypothetical protein	0.00064	0.00025	0	2.56	0.39	0
21	Bm1_25280	Prion-like--related	0.00064	0.00022	4.8e-05	2.37	0.32	0.06
22	Bm1_24820	Histidine acid phosphatase family protein	0.00061	8.2e-05	1.4e-05	6.32	0.13	0.02
23	Bm1_10500	AMOP domain containing protein	0.00061	8.9e-06	9.3e-05	5.99	0.01	0.15
24	Bm1_30265	Tubulin alpha chain, putative	0.00059	0	0.0002	2.95	0	0.34
25	Bm1_42930	Excitatory amino acid transporter, putative	0.00057	0.00015	5.8e-05	2.75	0.24	0.08
26	Bm1_08150	NAD-dependent malic enzyme, mitochondrial precursor, putative	0.00055	6.3e-05	1.4e-05	7.1	0.11	0.02
27	Bm1_48705	conserved hypothetical protein	0.00054	5e-05	0.00013	3.02	0.07	0.22
28		TIGR 14954.m01642	0.00054	0	0	9999	0	0
29	Bm1_48185	putative amidase	0.00051	5e-05	8.7e-05	3.74	0.08	0.15
30	Bm1_07845	hypothetical protein	0.00049	9.6e-05	0.00014	2.09	0.15	0.24
31	Bm1_06470	Hypothetical protein	0.00047	0	0	9999	0	0
32	Bm1_24840	Major Facilitator Superfamily protein	0.00047	0	2.4e-05	19.88	0	0.05
33	Bm1_38440	hypothetical protein	0.00046	0	0	9999	0	0
34	Bm1_23640	Hypothetical 95.1 kDa protein in ACT5-YCK1 intergenic region, putative	0.00045	0	0.00015	2.95	0	0.34
35	Bm1_10065	hypothetical protein	0.00044	7.9e-05	0.00011	2.27	0.14	0.22
36	Bm1_37455	conserved hypothetical protein	0.00044	6.9e-05	0.00012	2.29	0.12	0.24
37	Bm1_18805	Papain family cysteine protease containing protein	0.00044	0	0	9999	0	0
38	Bm1_04935	hypothetical protein	0.00044	0	0	9999	0	0
39	Bm1_13645	hypothetical protein	0.00044	0	0	9999	0	0
40	Bm1_00205	ShTK domain containing protein	0.00042	0.0001	2.2e-05	3.42	0.23	0.04
41	Bm1_31865	Probable calcium-binding mitochondrial carrier F55A11.4, putative	0.00042	4e-05	6.9e-05	3.89	0.08	0.15
42	Bm1_03625	hypothetical protein	0.00041	0.00011	0	3.84	0.26	0
43	Bm1_01535	2-amino-3-ketobutyrate coenzyme A ligase, mitochondrial precursor, putative	0.00041	0	0.00012	3.27	0	0.31
44	Bm1_17255	hypothetical protein	0.00038	8e-05	2.3e-05	3.64	0.2	0.05
45	Bm1_55915	hypothetical protein	0.00037	9.6e-05	8.3e-05	2.05	0.21	0.18
46	Bm1_22845	hypothetical protein	0.00036	9.3e-05	0	3.84	0.26	0
47	Bm1_41720	Signal recognition particle 19 kDa protein, putative	0.00035	9.2e-05	4e-05	2.68	0.23	0.09
48	Bm1_25035	Tubulin alpha-2 chain, putative	0.00035	4.5e-05	0.00012	2.13	0.1	0.3
49	Bm1_32415	Hypothetical 21.5 kDa protein in SEC15-SAP4 intergenic region.-related	0.00034	0	0.00017	2.06	0	0.49
50	Bm1_11310	lipoprotein-related	0.00034	0	0	9999	0	0
51	Bm1_17180	MiaB-like tRNA modifying enzyme, archaeal-type family protein	0.00033	3e-05	7.8e-05	3.02	0.07	0.22
52	Bm1_06760	zgc:100814 protein-related	0.00031	7.5e-05	1.6e-05	3.42	0.23	0.04
53	Bm1_34425	Ctr copper transporter family protein	0.00031	2.4e-05	0	12.8	0.08	0
54	Bm1_20325	Hypothetical protein-conserved	0.0003	4.1e-05	4.8e-05	3.36	0.12	0.14
55	Bm1_41755	Ras family protein	0.0003	2.9e-05	0	10.24	0.1	0
56	Bm1_23035	Hypothetical protein	0.0003	2.1e-05	0	14.08	0.07	0
57	Bm1_01765	Probable mitochondrial import receptor subunit TOM7-like	0.0003	0	0	9999	0	0
58	Bm1_27755	hypothetical protein	0.00029	8.2e-05	5.7e-05	2.11	0.23	0.15
59	Bm1_09515	Hypothetical protein	0.00029	0	4e-05	7.36	0	0.14
60	Bm1_16980	Hypothetical protein	0.00029	0	0	9999	0	0
61	Bm1_48590	Low-density lipoprotein receptor domain class A containing protein	0.00028	8.7e-05	3.8e-05	2.23	0.28	0.1
62	deleted	AMINO ACID PERMEASE FAMILY PROTEIN 862	0.00028	2.3e-05	6.8e-06	9.26	0.08	0.02
63	Bm1_22450	hemimethylated DNA binding domain containing protein	0.00027	5.4e-05	4.7e-05	2.74	0.17	0.14
64	Bm1_09945	hypothetical protein	0.00026	0.0001	0	2.56	0.39	0
65	Bm1_37475	Major Facilitator Superfamily protein	0.00026	5e-05	5.8e-05	2.37	0.16	0.19
66	Bm1_08720	ABC transporter N-terminus family protein	0.00026	0	0	9999	0	0
67	Bm1_48010	EGF-like domain containing protein	0.00025	0.0001	2e-05	2.03	0.38	0.06
68	Bm1_18870	Bucentaur or craniofacial development family protein	0.00025	5.5e-05	0	4.48	0.22	0
69	Bm1_23235	RNA lariat debranching enzyme, putative	0.00025	4.9e-05	3.2e-05	3.1	0.17	0.11
70	Bm1_18325	cell junction protein LIN-7, putative	0.00025	3.3e-05	8.6e-05	2.13	0.1	0.3
71	Bm1_25755	hypothetical protein	0.00024	2.4e-05	0	10.24	0.1	0
72	Bm1_00920	Hypothetical 30.5 kDa protein ZK1321.3 in chromosome II.-related	0.00024	0	3.3e-05	7.36	0	0.14
73	Bm1_47925	Growth-Arrest-Specific Protein 2 Domain containing protein	0.00023	1.5e-05	7.2e-05	2.61	0.05	0.3
74	Bm1_30115	Hypothetical protein	0.00023	0	0	9999	0	0
75	Bm1_10415	hypothetical protein	0.00023	0	7.7e-05	2.95	0	0.34
76	Bm1_40010	NRAMP-like transporter K11G12.4, putative	0.00023	0	2.4e-05	9.57	0	0.1
77	Bm1_54240	Endonuclease/Exonuclease/phosphatase family protein	0.00022	5.2e-05	1.5e-05	3.31	0.22	0.06
78	Bm1_19735	P-glycoprotein related protein 2, putative	0.00022	3.4e-05	2.9e-05	3.42	0.14	0.12
79	Bm1_53540	NAD-dependent malic enzyme, mitochondrial precursor, putative	0.00022	2.4e-05	2.1e-05	4.79	0.1	0.09
80	Bm1_22775	hypothetical protein	0.00022	2.2e-05	3.8e-05	3.74	0.08	0.15
81	Bm1_29435	Hypothetical protein	0.00021	6.6e-05	0	3.2	0.31	0
82	deleted	NO NAME 374	0.00021	1.8e-05	0	11.52	0.09	0
83	Bm1_22820	hypothetical protein	0.00021	0	0	9999	0	0
84	Bm1_21910	hypothetical protein	0.00021	0	3.5e-05	5.89	0	0.17
85	Bm1_57385	IBR domain containing protein	0.0002	7.8e-05	1.7e-05	2.1	0.36	0.06
86	Bm1_06585	hypotetical protein, conserved	0.0002	7.6e-05	0	2.56	0.39	0
87	Bm1_13260	intermediate filament protein Ov71 (fragment), putative	0.0002	5.2e-05	0	3.84	0.26	0
88	Bm1_11005	MGC84665 protein-related	0.0002	4e-05	3.5e-05	2.74	0.17	0.14
89	Bm1_02560	Sodium/calcium exchanger protein	0.0002	3.9e-05	3.4e-05	2.74	0.17	0.14
90	Bm1_38360	major facilitator superfamily protein	0.0002	2.4e-05	7.2e-05	2.06	0.09	0.33
91	Bm1_44640	Mospd2 protein, putative	0.0002	1.2e-05	1e-05	8.9	0.06	0.05
92	Bm1_17285	conserved hypothetical protein	0.0002	0	0	9999	0	0
93	Bm1_41280	uncharacterized hypothalamus protein HTMP, putative	0.0002	0	5.9e-05	3.44	0	0.29
94	Bm1_52990	Roadblock/LC7 domain containing protein	0.0002	0	9.1e-05	2.21	0	0.45
95	Bm1_19865	hypothetical protein	0.0002	0	3.4e-05	5.89	0	0.17
96	Bm1_34095	hypothetical protein	0.0002	0	0	9999	0	0
97	Bm1_49060	putative anaphase promoting complex subunit 11	0.0002	0	8.9e-05	2.21	0	0.45
98	Bm1_44010	hypothetical protein	0.00019	3.6e-05	3.2e-05	2.74	0.17	0.14
99	Bm1_57235	hypothetical protein	0.00019	0	6.6e-05	2.95	0	0.34
100	Bm1_30935	hypothetical protein	0.00019	0	6.5e-05	2.95	0	0.34
101	Bm1_55025	conserved hypothetical protein	0.00018	4.7e-05	2e-05	2.68	0.23	0.09
102	Bm1_26265	Zinc knuckle family protein	0.00018	4.6e-05	4e-05	2.05	0.21	0.18
103	Bm1_18810	hypothetical protein	0.00018	3.5e-05	3.1e-05	2.74	0.17	0.14
104	Bm1_18965	Hypothetical protein	0.00018	2.7e-05	4.8e-05	2.34	0.12	0.23
105	Bm1_38285	Ser/Thr protein phosphatase family protein	0.00018	2.3e-05	0	7.68	0.13	0
106	Bm1_04875	hypothetical protein	0.00018	0	6.3e-05	2.95	0	0.34
107	Bm1_02880	conserved hypothetical protein	0.00018	0	4.1e-05	4.42	0	0.23
108	Bm1_47205	hypothetical protein	0.00018	0	0	9999	0	0
109	Bm1_46230	hypothetical protein	0.00018	0	8.1e-05	2.21	0	0.45
110	Bm1_44330	P-glycoprotein, putative	0.00018	0	0	9999	0	0
111	Bm1_15490	ABC transporter family protein	0.00017	4.7e-05	2.5e-05	2.36	0.24	0.11
112	Bm1_34535	hypothetical protein	0.00017	4.5e-05	3.4e-05	2.1	0.23	0.16
113	Bm1_49980	hypothetical protein	0.00017	0	0	9999	0	0
114	Bm1_44930	HT014, PUTATIVE	0.00017	0	5.7e-05	2.95	0	0.34
115	Bm1_27395	PDZ domain containing protein	0.00017	0	7.8e-05	2.14	0	0.47
116	Bm1_48180	Amidase family protein	0.00016	1.8e-05	4.7e-05	2.48	0.09	0.26
117	Bm1_09665	hypothetical protein	0.00016	0	5.5e-05	2.95	0	0.34
118	Bm1_33605	hypothetical protein	0.00016	0	0	9999	0	0
119	Bm1_51535	hypothetical protein	0.00016	0	0	9999	0	0
120	Bm1_36055	hexokinase, putative	0.00016	0	4e-05	3.93	0	0.25
121	Bm1_37830	vab-3 gene, putative	0.00016	0	0	9999	0	0
122	Bm1_54645	Germinal center kinase family protein 1, isoform d-related	0.00016	0	0	9999	0	0
123	Bm1_54935	Kazal-type serine protease inhibitor domain containing protein	0.00016	0	3.5e-05	4.42	0	0.23
124	Bm1_31305	vesicular acetylcholine transporter unc-17, putative	0.00015	3.8e-05	2.2e-05	2.43	0.23	0.12
125	Bm1_21920	MGC53320 protein-related	0.00015	0	5.1e-05	2.95	0	0.34
126	Bm1_36250	hypothetical protein	0.00015	0	0	9999	0	0
127	Bm1_30410	conserved hypothetical protein	0.00015	0	2.5e-05	5.89	0	0.17
128	Bm1_05035	excretory/secretory protein Juv-p120 precursor-related	0.00015	0	4.2e-05	3.44	0	0.29
129	Bm1_11345	Hypothetical protein-conserved	0.00014	5.3e-05	0	2.56	0.39	0
130	Bm1_15975	hypothetical protein	0.00014	4.7e-05	1.4e-05	2.32	0.31	0.07
131	Bm1_38320	TPR Domain containing protein	0.00014	4.2e-05	2.5e-05	2.16	0.25	0.13
132	Bm1_36290	Putative phosphatidate cytidylyltransferase, putative	0.00014	2.8e-05	0	5.12	0.2	0
133	Bm1_49135	hypothetical protein	0.00014	2.2e-05	1.9e-05	3.42	0.14	0.12
134	Bm1_15855	D4Ertd196e protein, putative	0.00014	0	3.3e-05	4.42	0	0.23
135	Bm1_43780	hypothetical protein	0.00014	0	0	9999	0	0
136		TIGR 14992.m11230	0.00014	0	4.6e-05	2.95	0	0.34
137	Bm1_17550	hypothetical protein	0.00013	5.2e-05	0	2.56	0.39	0
138	Bm1_11255	SNARE domain containing protein	0.00013	2.5e-05	2.2e-05	2.74	0.17	0.14
139	Bm1_31730	phosphatidate cytidylyltransferase-related	0.00013	0	4.5e-05	2.95	0	0.34
140	Bm1_32085	rab6, putative	0.00013	0	4.5e-05	2.95	0	0.34
141	Bm1_36760	Prefoldin subunit 4, putative	0.00013	0	0	9999	0	0
142	Bm1_02820	EGF-like domain containing protein	0.00013	0	0	9999	0	0
143	Bm1_19350	Cam kinase kinase protein 1, isoform a, putative	0.00012	4.9e-05	0	2.56	0.39	0
144	Bm1_52975	ER lumen protein retaining receptor, putative	0.00012	3.2e-05	2.7e-05	2.05	0.21	0.18
145		TIGR 14320.m00074	0.00012	3e-05	0	3.84	0.26	0
146	Bm1_47435	hypothetical protein	0.00012	2.3e-05	2e-05	2.74	0.17	0.14
147	Bm1_27840	hypothetical protein, conserved	0.00012	1.9e-05	3.2e-05	2.34	0.12	0.23
148	Bm1_15480	Acyltransferase family protein	0.00012	1e-05	9e-06	6.16	0.08	0.07
149	Bm1_24025	3'5'-cyclic nucleotide phosphodiesterase family protein	0.00012	1e-05	1.8e-05	4.21	0.08	0.14
150	Bm1_28420	DnaJ protein, putative	0.00012	0	2.8e-05	4.42	0	0.23
151	Bm1_26335	Ground-like domain containing protein	0.00012	0	2e-05	5.89	0	0.17
152	Bm1_07355	Proline-rich protein MP-2 precursor.-related	0.00011	4.4e-05	0	2.56	0.39	0
153	Bm1_20115	hypothetical protein	0.00011	4.3e-05	7.5e-06	2.18	0.37	0.05
154	Bm1_13325	Cuticle collagen 7 precursor.-related	0.00011	2.8e-05	2.4e-05	2.05	0.21	0.18
155	Bm1_38160	Fatty acid desaturase family protein	0.00011	1.8e-05	1.6e-05	3.42	0.14	0.12
156	Bm1_07875	CONSERVED HYPOTHETICAL PROTEIN	0.00011	0	2.5e-05	4.42	0	0.23
157	Bm1_29155	Zinc finger, C2H2 type family protein	0.00011	0	0	9999	0	0
158	Bm1_40390	hypothetical protein	0.00011	0	4.8e-06	22.09	0	0.05
159	Bm1_37895	Hypothetical 18.4 kDa protein T05H10.3 in chromosome II precursor.-related	0.0001	4.1e-05	0	2.56	0.39	0
160	Bm1_04695	Cuticle collagen F09G8.6.-related	0.0001	3.3e-05	1.4e-05	2.23	0.28	0.1
161	Bm1_34585	hypothetical protein	0.0001	2.7e-05	1.6e-05	2.43	0.23	0.12
162	Bm1_36570	Thrombospondin type 1 domain containing protein	0.0001	1.3e-05	1.2e-05	4.11	0.12	0.1
163	Bm1_15610	LD27042p-related	0.0001	1.3e-05	1.1e-05	4.11	0.12	0.1
164	Bm1_50985	Complement component C6 precursor.-related	0.0001	0	3.4e-05	2.95	0	0.34
165	Bm1_10845	hypothetical protein	9.9e-05	0	0	9999	0	0
166	Bm1_42390	hypothetical protein	9.8e-05	3.8e-05	0	2.56	0.39	0
167	Bm1_11290	TPR Domain containing protein	9.7e-05	1.6e-05	9.4e-06	3.78	0.15	0.08
168	Bm1_35065	SNARE domain containing protein	9.6e-05	0	4.4e-05	2.21	0	0.45
169	Bm1_48790	Peptidase dimerisation domain containing protein	9.6e-05	0	0	9999	0	0
170	Bm1_02555	Hypothetical protein	9.4e-05	0	0	9999	0	0
171	Bm1_07615	Peroxin-3 family protein	9.3e-05	3.6e-05	0	2.56	0.39	0
172	Bm1_09615	Hypothetical protein	9.3e-05	3.6e-05	0	2.56	0.39	0
173	Bm1_15565	hypothetical protein	9.3e-05	0	3.2e-05	2.95	0	0.34
174	Bm1_13125	ras-binding protein SUR-8, putative	9.2e-05	0	0	9999	0	0
175	Bm1_10820	KIAA1033 protein-related	9.1e-05	3e-05	8.8e-06	2.32	0.31	0.07
176	Bm1_14810	hypothetical protein, conserved	9.1e-05	0	0	9999	0	0
177	Bm1_11955	trafficking protein particle complex 5, putative	9e-05	3.5e-05	0	2.56	0.39	0
178	Bm1_30460	MH1 domain containing protein	9e-05	1.8e-05	0	5.12	0.2	0
179	Bm1_33780	hypothetical protein	8.9e-05	1.2e-05	3e-05	2.13	0.1	0.3
180	Bm1_26540	ARP2/3 complex 20 kDa subunit, putative	8.9e-05	0	0	9999	0	0
181	Bm1_31355	hypothetical protein	8.9e-05	0	0	9999	0	0
182	Bm1_42075	zgc:92765, putative	8.7e-05	0	1.5e-05	5.89	0	0.17
183	Bm1_39815	Ly-6-related protein HOT-2-related	8.6e-05	0	0	9999	0	0
184	Bm1_22345	calcipressin-like protein, putative	8.5e-05	0	0	9999	0	0
185	Bm1_35855	hypothetical protein	8.5e-05	0	2.9e-05	2.95	0	0.34
186	Bm1_00270	ImpB/MucB/SamB family protein	8.4e-05	1.9e-05	1.6e-05	2.4	0.19	0.16
187	Bm1_03870	hypothetical protein	8.4e-05	1.6e-05	0	5.12	0.2	0
188	Bm1_30585	Tyrosine-protein kinase abl-1.-related	8.4e-05	0	1.9e-05	4.42	0	0.23
189	Bm1_42780	WD domain, G-beta repeat	8.4e-05	0	1.9e-05	4.42	0	0.23
190	Bm1_05190	hypothetical protein	8.3e-05	3.2e-05	0	2.56	0.39	0
191	Bm1_21570	Probable 3-hydroxyacyl-CoA dehydrogenase B0272.3, putative	8.3e-05	2.2e-05	0	3.84	0.26	0
192	Bm1_13055	UBA/TS-N DOMAIN CONTAINING PROTEIN	8.3e-05	0	0	9999	0	0
193	Bm1_29550	Ground-like domain containing protein	8.3e-05	0	0	9999	0	0
194	Bm1_28830	cardiac lineage protein 1-related	8.1e-05	0	0	9999	0	0
195	Bm1_23445	tetratricopeptide repeat domain 17-related	8.1e-05	0	2.8e-05	2.95	0	0.34
196	Bm1_42615	MGC64450 protein, putative	8.1e-05	0	2.7e-05	2.95	0	0.34
197	Bm1_20460	hypothetical protein	8e-05	0	2.7e-05	2.95	0	0.34
198	Bm1_26805	CG32112-PA-related	7.9e-05	2e-05	0	3.84	0.26	0
199	Bm1_49615	hypothetical protein	7.7e-05	2e-05	1.7e-05	2.05	0.21	0.18
200	Bm1_38955	Twik family of potassium channels protein 28, putative	7.7e-05	0	1e-05	7.36	0	0.14
201	Bm1_04140	conserved hypothetical protein	7.6e-05	2e-05	1.7e-05	2.05	0.21	0.18
202	Bm1_37100	fgfr1op2-prov protein-related	7.6e-05	0	2.6e-05	2.95	0	0.34
203	Bm1_17595	GLYCOSYL HYDROLASE FAMILY 85 PROTEIN	7.5e-05	1.9e-05	0	3.84	0.26	0
204	Bm1_25880	hypothetical protein	7.4e-05	2.9e-05	0	2.56	0.39	0
205	Bm1_03820	SKI/SNO/DAC family protein	7.4e-05	0	1.7e-05	4.42	0	0.23
206	Bm1_11660	TPR Domain containing protein	7.4e-05	0	3.4e-05	2.21	0	0.45
207	Bm1_26830	S-adenosylmethionine decarboxylase proenzyme, putative	7.3e-05	1.9e-05	0	3.84	0.26	0
208	Bm1_05350	MGC81364 protein-related	7.3e-05	0	2.5e-05	2.95	0	0.34
209	Bm1_35080	ttc15-prov protein, putative	7.3e-05	0	0	9999	0	0
210	Bm1_23705	protein C24B5.3 , putative	7.2e-05	2.1e-05	0	3.41	0.29	0
211	Bm1_15660	DnaJ domain containing protein	7.2e-05	0	7e-06	10.31	0	0.1
212	Bm1_44210	conserved hypothetical protein	7.1e-05	2.8e-05	0	2.56	0.39	0
213	Bm1_47315	hypothetical protein	7.1e-05	1.8e-05	1.6e-05	2.05	0.21	0.18
214	Bm1_56035	hypothetical protein	7.1e-05	1.1e-05	9.7e-06	3.42	0.14	0.12
215	Bm1_50110	hypothetical protein	7.1e-05	0	9.7e-06	7.36	0	0.14
216	Bm1_40365	Ras family protein	7.1e-05	0	2.4e-05	2.95	0	0.34
217	Bm1_10690	Proable exocyst complex component Sec6, putative	7.1e-05	0	1.9e-05	3.68	0	0.27
218	Bm1_48455	Eukaryotic translation initiation factor 6, putative	7e-05	2.7e-05	0	2.56	0.39	0
219	Bm1_53700	hypothetical protein	7e-05	0	2.4e-05	2.95	0	0.34
220	Bm1_26845	Hypothetical protein	7e-05	0	0	9999	0	0
221	Bm1_17795	hypothetical protein	7e-05	0	0	9999	0	0
222	Bm1_57335	Conserved hypothetical protein, putative	7e-05	0	0	9999	0	0
223	Bm1_40290	Raf kinase, putative	6.9e-05	1.8e-05	7.8e-06	2.68	0.23	0.09
224	Bm1_06830	ABC transporter transmembrane region family protein	6.9e-05	0	0	9999	0	0
225	Bm1_04010	EGF-like domain containing protein	6.8e-05	2.7e-05	0	2.56	0.39	0
226	Bm1_42365	ZIP Zinc transporter family protein	6.7e-05	0	0	9999	0	0
227	Bm1_21670	RNase H family protein	6.6e-05	2.6e-05	0	2.56	0.39	0
228	Bm1_23850	cDNA sequence BC017158-related	6.6e-05	0	1.5e-05	4.42	0	0.23
229	Bm1_35000	Protein FAM20C precursor.-related	6.6e-05	0	1.5e-05	4.42	0	0.23
230	Bm1_44770	TWiK family of potassium channels protein 7, putative	6.5e-05	0	2.2e-05	2.95	0	0.34
231	Bm1_42465	hypothetical protein	6.5e-05	0	3e-05	2.21	0	0.45
232	Bm1_46515	hypothetical protein	6.5e-05	0	2.2e-05	2.95	0	0.34
233	Bm1_49590	CG3054-PA-related	6.5e-05	0	2.2e-05	2.95	0	0.34
234	Bm1_29240	hypothetical protein	6.4e-05	0	1.4e-05	4.42	0	0.23
235	Bm1_51820	Serine/threonine protein phosphatase PP1 isozyme 1, putative	6.4e-05	0	2.2e-05	2.95	0	0.34
236	Bm1_27105	hypothetical protein	6.4e-05	0	2.2e-05	2.95	0	0.34
237	Bm1_20155	hypothetical protein	6.3e-05	1.6e-05	0	3.84	0.26	0
238	Bm1_52335	UDP-N-acetylglucosamine-dolichyl-phosphate N-acetylglucosaminephosphotransferase, putative	6.3e-05	0	1.4e-05	4.42	0	0.23
239	Bm1_49525	hypothetical protein	6.3e-05	0	0	9999	0	0
240	Bm1_11430	Protein C20orf142 homolog precursor.-related	6.3e-05	0	0	9999	0	0
241	Bm1_49575	interleukin-16, putative	6.2e-05	9.7e-06	8.4e-06	3.42	0.14	0.12
242	Bm1_43060	hypothetical protein	6.2e-05	0	0	9999	0	0
243	Bm1_54400	oxidoreductase-related	6.2e-05	0	0	9999	0	0
244	Bm1_36745	hypothetical protein	6.2e-05	0	2.1e-05	2.95	0	0.34
245	Bm1_37325	AN1-like Zinc finger family protein	6.1e-05	0	1.4e-05	4.42	0	0.23
246	Bm1_53050	Reprolysin	6.1e-05	0	2.1e-05	2.95	0	0.34
247	Bm1_41270	hypothetical protein	6.1e-05	0	2.1e-05	2.95	0	0.34
248	Bm1_42945	diphosphomevalonate decarboxylase family protein	6e-05	1.6e-05	1.4e-05	2.05	0.21	0.18
249	Bm1_32630	hypothetical protein	6e-05	0	0	9999	0	0
250	Bm1_54070	F25C8.3 protein-related	6e-05	0	0	9999	0	0
251	Bm1_04925	coronin 2A, putative	5.9e-05	1.5e-05	0	3.84	0.26	0
252	Bm1_03755	Pol polyprotein , putative	5.9e-05	0	0	9999	0	0
253	Bm1_53475	Nematode cuticle collagen N-terminal domain containing protein	5.9e-05	0	2e-05	2.95	0	0.34
254	Bm1_45690	26S proteasome non-ATPase regulatory subunit Nin1/mts3 family protein	5.9e-05	0	0	9999	0	0
255	Bm1_46015	F-box domain containing protein	5.9e-05	0	2e-05	2.95	0	0.34
256	Bm1_38700	conserved hypothetical protein	5.9e-05	0	0	9999	0	0
257	Bm1_07750	metalloprotease, putative	5.8e-05	2.3e-05	0	2.56	0.39	0
258	Bm1_22930	phosphorylase B kinase alpha regulatory chain, putative	5.8e-05	1.5e-05	1.3e-05	2.05	0.21	0.18
259	Bm1_43465	Temporarily assigned gene name protein 40, putative	5.8e-05	7.6e-06	0	7.68	0.13	0
260	Bm1_02085	hypothetical protein	5.8e-05	0	2e-05	2.95	0	0.34
261	Bm1_54810	hypothetical protein	5.8e-05	0	2.6e-05	2.21	0	0.45
262	Bm1_43075	hypothetical protein	5.8e-05	0	2e-05	2.95	0	0.34
263	Bm1_02740	Hypothetical protein	5.8e-05	0	0	9999	0	0
264	Bm1_03075	Methyltransferase-like protein.-related	5.8e-05	0	2e-05	2.95	0	0.34
265	Bm1_27875	hypothetical protein	5.8e-05	0	2e-05	2.95	0	0.34
266	Bm1_28870	MOFRL family protein	5.8e-05	0	1.3e-05	4.42	0	0.23
267	Bm1_49865	hypothetical protein	5.7e-05	2.2e-05	0	2.56	0.39	0
268	Bm1_07985	conserved hypothetical protein	5.7e-05	1.5e-05	0	3.84	0.26	0
269	Bm1_37660	Oxysterol-binding protein	5.7e-05	8.9e-06	7.7e-06	3.42	0.14	0.12
270	Bm1_55095	hypothetical protein	5.7e-05	0	0	9999	0	0
271	Bm1_11905	hypothetical protein	5.7e-05	0	1.3e-05	4.42	0	0.23
272	Bm1_06020	Neurobeachin homolog, putative	5.7e-05	0	1.9e-05	2.95	0	0.34
273	Bm1_42505	roughened eye, putative	5.7e-05	0	0	9999	0	0
274	Bm1_37155	conserved hypothetical protein	5.7e-05	0	0	9999	0	0
275	Bm1_38890	NAS-15 protein, putative	5.7e-05	0	2.6e-05	2.21	0	0.45
276	Bm1_43510	Probable rRNA processing protein EBP2 homolog.-related	5.7e-05	0	0	9999	0	0
277	Bm1_27790	Fibronectin type III domain containing protein	5.6e-05	0	0	9999	0	0
278	Bm1_35630	Low-density lipoprotein receptor domain class A containing protein	5.5e-05	1.4e-05	1.2e-05	2.05	0.21	0.18
279	Bm1_43670	Heat shock 70 kDa protein, putative	5.5e-05	0	1.9e-05	2.95	0	0.34
280	Bm1_40190	DXImx40e protein-related	5.4e-05	1.4e-05	1.2e-05	2.05	0.21	0.18
281	Bm1_28030	SH3 domain-binding protein 5, putative	5.4e-05	0	1.2e-05	4.42	0	0.23
282	Bm1_08195	HYPOTHETICAL PROTEIN	5.4e-05	0	2.4e-05	2.21	0	0.45
283	Bm1_28650	XPG N-terminal domain containing protein	5.4e-05	0	1.2e-05	4.42	0	0.23
284	Bm1_25895	hypothetical protein	5.3e-05	2.1e-05	0	2.56	0.39	0
285	Bm1_10395	Heavy chain, unconventional myosin protein 2, isoform d, putative	5.3e-05	1.4e-05	1.2e-05	2.05	0.21	0.18
286	Bm1_25200	Mitochondrial carrier C16C10.1, putative	5.2e-05	0	0	9999	0	0
287	Bm1_27005	hypothetical protein	5.1e-05	0	1.7e-05	2.95	0	0.34
288	Bm1_45625	hypothetical protein	5.1e-05	0	0	9999	0	0
289	Bm1_56715	SH2 domain containing protein	5.1e-05	0	1.7e-05	2.95	0	0.34
290	Bm1_21270	Hypothetical 35.8 kDa protein F37A4.5 in chromosome III, putative	5.1e-05	0	1.7e-05	2.95	0	0.34
291	Bm1_33655	HYPOTHETICAL 65.5 KDA TRP-ASP REPEATS CONTAINING PROTEIN F02E8.5 INCHROMOSOME X.-RELATED	5e-05	1.3e-05	1.1e-05	2.05	0.21	0.18
292	Bm1_55545	Mob1/phocein family protein	5e-05	0	1.7e-05	2.95	0	0.34
293	Bm1_38690	Sec7 domain containing protein	5e-05	0	1.7e-05	2.95	0	0.34
294	Bm1_39690	conserved hypothetical protein	5e-05	0	0	9999	0	0
295	Bm1_30070	conserved hypothetical protein	5e-05	0	0	9999	0	0
296	Bm1_55595	C3H-1 protein, putative	4.9e-05	1.9e-05	0	2.56	0.39	0
297	Bm1_22690	Leucine Rich Repeat family protein	4.9e-05	6.3e-06	1.7e-05	2.13	0.1	0.3
298	Bm1_32985	Apical junction molecule protein 1, isoform d, putative	4.9e-05	0	1.7e-05	2.95	0	0.34
299	Bm1_57440	GTP-ase activating protein for Arf containing protein	4.9e-05	0	0	9999	0	0
300	Bm1_34475	hypothetical protein	4.8e-05	1.3e-05	1.1e-05	2.05	0.21	0.18
301	Bm1_18060	hypothetical protein	4.8e-05	0	0	9999	0	0
302	Bm1_51340	Guanine nucleotide-binding protein alpha-3 subunit, putative	4.8e-05	0	0	9999	0	0
303	Bm1_51260	Innexin family protein	4.8e-05	0	0	9999	0	0
304	Bm1_12770	hypothetical protein, conserved	4.8e-05	0	1.6e-05	2.95	0	0.34
305	Bm1_27025	6-phosphofructokinase, putative	4.8e-05	0	1.6e-05	2.95	0	0.34
306	Bm1_20590	hypothetical protein	4.8e-05	0	0	9999	0	0
307	Bm1_48575	BTB/POZ domain containing protein	4.7e-05	1.8e-05	0	2.56	0.39	0
308	Bm1_01695	RE11181p-related	4.7e-05	1.8e-05	0	2.56	0.39	0
309	Bm1_09775	serpin, putative	4.7e-05	1.8e-05	0	2.56	0.39	0
310	Bm1_36725	tRNA pseudouridine synthase D	4.7e-05	1.2e-05	0	3.84	0.26	0
311	Bm1_45100	hypothetical protein	4.7e-05	9.2e-06	0	5.12	0.2	0
312	Bm1_20005	conserved hypothetical protein	4.7e-05	0	0	9999	0	0
313	Bm1_44655	Fukutin.-related	4.7e-05	0	1.6e-05	2.95	0	0.34
314	Bm1_18445	heavy chain, unconventional myosin protein 2, isoform a, putative	4.7e-05	0	1.1e-05	4.42	0	0.23
315	Bm1_37140	Major Facilitator Superfamily protein	4.7e-05	0	1.6e-05	2.95	0	0.34
316	Bm1_05510	cation channel family protein	4.6e-05	8e-06	1e-05	2.5	0.14	0.19
317	Bm1_36780	G-patch domain containing protein	4.6e-05	0	1.6e-05	2.95	0	0.34
318	Bm1_50155	Histidine acid phosphatase family protein	4.6e-05	0	0	9999	0	0
319	Bm1_30815	Conserved hypothetical protein, putative	4.6e-05	0	0	9999	0	0
320	Bm1_26370	Rhomboid family protein	4.6e-05	0	1.5e-05	2.95	0	0.34
321	Bm1_52960	epimerase/reductase-related	4.6e-05	0	0	9999	0	0
322	Bm1_26820	hypothetical protein	4.5e-05	1.7e-05	0	2.56	0.39	0
323	Bm1_16105	hypothetical protein	4.5e-05	1.4e-05	6.1e-06	2.23	0.28	0.1
324	Bm1_12825	Annexin family protein	4.5e-05	0	0	9999	0	0
325	Bm1_46300	hypothetical protein, conserved	4.4e-05	1.7e-05	0	2.56	0.39	0
326	Bm1_27230	hypothetical protein	4.4e-05	1.7e-05	0	2.56	0.39	0
327	Bm1_18945	WD repeat membrane protein-related	4.4e-05	9.9e-06	8.6e-06	2.4	0.19	0.16
328	Bm1_54540	RIKEN cDNA 5730509K17 gene-related	4.4e-05	0	0	9999	0	0
329	Bm1_41815	HIV TAT SPECIFIC FACTOR 1, PUTATIVE	4.4e-05	0	1.5e-05	2.95	0	0.34
330	Bm1_31675	DEATH DOMAIN CONTAINING PROTEIN	4.3e-05	1.1e-05	9.7e-06	2.05	0.21	0.18
331	Bm1_40235	hypothetical protein	4.3e-05	0	0	9999	0	0
332	Bm1_55745	sulfakinin receptor protein, putative	4.3e-05	0	0	9999	0	0
333	Bm1_09180	hypothetical protein	4.3e-05	0	1.5e-05	2.95	0	0.34
334	Bm1_40530	Glycosyl transferase family 8 protein	4.3e-05	0	9.7e-06	4.42	0	0.23
335	Bm1_21865	acetyl-CoA acyltransferases family protein	4.3e-05	0	0	9999	0	0
336	Bm1_19270	hypothetical protein	4.2e-05	1.6e-05	0	2.56	0.39	0
337	Bm1_42045	Hypothetical 52.5 kDa protein ZK945.1 in chromosome II, putative	4.2e-05	1.6e-05	0	2.56	0.39	0
338	Bm1_19730	Autophagy protein Apg9 containing protein	4.2e-05	8.2e-06	0	5.12	0.2	0
339	Bm1_01180	DB module family protein	4.2e-05	0	0	9999	0	0
340	Bm1_31525	probable zinc metalloproteinase, putative	4.2e-05	0	0	9999	0	0
341	Bm1_01520	GRAM domain containing protein	4.2e-05	0	7.1e-06	5.89	0	0.17
342	Bm1_05960	Patched family protein	4.1e-05	8e-06	6.9e-06	2.74	0.17	0.14
343	Bm1_51890	Pax transcription activation domain interacting protein, putative	4.1e-05	0	1.9e-05	2.21	0	0.45
344	Bm1_56965	conserved hypothetical protein	4e-05	1.6e-05	0	2.56	0.39	0
345	Bm1_52210	hypothetical protein	4e-05	0	0	9999	0	0
346	Bm1_41070	Zinc finger DHHC domain containing protein 5, putative	3.9e-05	1.5e-05	0	2.56	0.39	0
347	Bm1_48235	Sema domain containing protein	3.9e-05	0	1.8e-05	2.21	0	0.45
348	Bm1_52450	conserved hypothetical protein	3.9e-05	0	8.9e-06	4.42	0	0.23
349	Bm1_08185	Cation transporter family protein	3.9e-05	0	0	9999	0	0
350	Bm1_23785	Protein kinase domain containing protein	3.9e-05	0	1.3e-05	2.95	0	0.34
351	Bm1_52080	conserved hypothetical protein	3.9e-05	0	0	9999	0	0
352	Bm1_46360	Transmembrane amino acid transporter protein	3.8e-05	1.5e-05	0	2.56	0.39	0
353	Bm1_46600	mKIAA2025 protein, putative	3.8e-05	1.5e-05	0	2.56	0.39	0
354	Bm1_55805	hypothetical protein	3.8e-05	0	1.3e-05	2.95	0	0.34
355	Bm1_21640	Hypothetical protein	3.7e-05	0	0	9999	0	0
356	Bm1_02710	kinesin-like protein KIF3A, putative	3.7e-05	0	0	9999	0	0
357	Bm1_52850	mannose-6-phosphate isomerase, class I family protein	3.6e-05	1.4e-05	0	2.56	0.39	0
358	Bm1_24985	cation efflux family protein	3.6e-05	1.4e-05	0	2.56	0.39	0
359	Bm1_44865	Hypothetical UPF0049 protein ZK1128.2 in chromosome III.-related	3.6e-05	1.4e-05	0	2.56	0.39	0
360	Bm1_49805	Solo, putative	3.6e-05	0	1.2e-05	2.95	0	0.34
361	Bm1_33645	Cytochrome P450 family protein	3.6e-05	0	0	9999	0	0
362	Bm1_35785	hypothetical protein	3.6e-05	0	8.2e-06	4.42	0	0.23
363	Bm1_03090	RNA binding motif protein, putative	3.5e-05	1.4e-05	0	2.56	0.39	0
364	Bm1_27610	RNA binding protein, putative	3.5e-05	0	0	9999	0	0
365	Bm1_29405	hypothetical protein	3.4e-05	1.3e-05	0	2.56	0.39	0
366	Bm1_01860	hypotetical protein, conserved	3.4e-05	1.3e-05	0	2.56	0.39	0
367	Bm1_49385	Rap/ran-GAP family protein	3.4e-05	1.1e-05	0	3.2	0.31	0
368	Bm1_33025	3' exoribonuclease family, domain 2 containing protein	3.4e-05	8.9e-06	0	3.84	0.26	0
369	Bm1_28040	Ubiquitin carboxyl-terminal hydrolase family protein	3.4e-05	5.3e-06	9.3e-06	2.34	0.12	0.23
370	Bm1_44985	Protein kinase domain containing protein	3.4e-05	0	0	9999	0	0
371	Bm1_12160	ABTAP-related	3.3e-05	1.3e-05	0	2.56	0.39	0
372	Bm1_19395	Protein kinase domain containing protein	3.3e-05	5.2e-06	4.5e-06	3.42	0.14	0.12
373	Bm1_49860	UBIQUITIN-CONJUGATING ENZYME FAMILY PROTEIN	3.3e-05	0	0	9999	0	0
374	Bm1_37555	TBC domain containing protein	3.3e-05	0	0	9999	0	0
375	Bm1_00795	E1-E2 ATPase family protein	3.2e-05	1.3e-05	0	2.56	0.39	0
376	Bm1_32470	Protein-tyrosine phosphatase containing protein	3.2e-05	0	0	9999	0	0
377	Bm1_31210	ZINC FINGER, C2H2 TYPE FAMILY PROTEIN	3.2e-05	0	0	9999	0	0
378	Bm1_22970	Zinc finger, C2H2 type family protein	3.1e-05	1.2e-05	0	2.56	0.39	0
379	Bm1_19480	conserved hypothetical protein	3.1e-05	0	1.4e-05	2.21	0	0.45
380	Bm1_33595	Nuclear hormone receptor family member nhr-25.-related	3.1e-05	0	0	9999	0	0
381	Bm1_34610	glycosyl transferase, group 2 family protein	3e-05	1.2e-05	0	2.56	0.39	0
382	Bm1_38425	3'-5' exonuclease family protein	3e-05	0	1e-05	2.95	0	0.34
383	Bm1_24900	cytosolic purine 5'-nucleotidase, putative	3e-05	0	1e-05	2.95	0	0.34
384	Bm1_41800	protein ZK524.3, putative	2.9e-05	0	6.6e-06	4.42	0	0.23
385	Bm1_26110	C1-like domain containing protein	2.9e-05	0	0	9999	0	0
386	Bm1_32800	hypothetical protein	2.9e-05	0	9.9e-06	2.95	0	0.34
387	Bm1_01915	Sulfatase family protein	2.9e-05	0	9.8e-06	2.95	0	0.34
388	Bm1_37170	family with sequence similarity 31, member B, putative	2.9e-05	0	9.8e-06	2.95	0	0.34
389	Bm1_28980	conserved hypothetical protein	2.8e-05	0	0	9999	0	0
390	Bm1_43555	ABC TRANSPORTER TRANSMEMBRANE REGION FAMILY PROTEIN	2.8e-05	0	1.1e-05	2.45	0	0.41
391	Bm1_44025	Shank2E, putative	2.8e-05	0	4.7e-06	5.89	0	0.17
392	Bm1_45165	RhoGEF domain containing protein	2.8e-05	0	4.7e-06	5.89	0	0.17
393	Bm1_21310	conserved hypothetical protein	2.7e-05	0	0	9999	0	0
394	Bm1_24700	Regulator of presynaptic activity aex-3, putative	2.7e-05	0	0	9999	0	0
395	Bm1_56145	conserved hypothetical protein	2.7e-05	0	9e-06	2.95	0	0.34
396	Bm1_36695	hypothetical protein	2.6e-05	0	5.9e-06	4.42	0	0.23
397	Bm1_33390	hypothetical protein	2.5e-05	9.7e-06	0	2.56	0.39	0
398	Bm1_54625	conserved hypothetical protein	2.4e-05	0	8.2e-06	2.95	0	0.34
399	Bm1_30980	GRP1 binding protein, putative	2.4e-05	0	5.4e-06	4.42	0	0.23
400	Bm1_22935	helicase, putative	2.3e-05	9.2e-06	0	2.56	0.39	0
401	Bm1_42705	SMC family, C-terminal domain containing protein	2.3e-05	0	1.1e-05	2.21	0	0.45
402	Bm1_39630	Immunoglobulin I-set domain containing protein	2.2e-05	5.7e-06	0	3.84	0.26	0
403	Bm1_35805	Doublecortin family protein	2.2e-05	5.7e-06	4.9e-06	2.05	0.21	0.18
404	Bm1_24325	MYB-LIKE DNA-BINDING DOMAIN CONTAINING PROTEIN	2.2e-05	0	0	9999	0	0
405	Bm1_32315	Adenylate kinase family protein	2.2e-05	0	7.3e-06	2.95	0	0.34
406	Bm1_50070	SacI homology domain containing protein	2.1e-05	8.4e-06	0	2.56	0.39	0
407	Bm1_43990	Latrophilin receptor protein 2, putative	2e-05	7.7e-06	0	2.56	0.39	0
408	Bm1_10045	TBC domain containing protein	1.9e-05	7.3e-06	0	2.56	0.39	0
409	Bm1_16585	hypothetical protein	1.7e-05	0	7.6e-06	2.21	0	0.45
410	Bm1_38300	Peptidase family M1 containing protein	1.6e-05	0	0	9999	0	0
411	Bm1_22575	conserved hypothetical protein	1.3e-05	0	4.5e-06	2.95	0	0.34
